# Supplementary material for: Targeting BPTF Sensitizes Pancreatic Ductal Adenocarcinoma to Chemotherapy by Repressing ABC-Transporters and Impairing Multidrug Resistance (MDR)
Source: Cancers (Basel). 2022 Mar 16;14(6):1518. doi: 10.3390/cancers14061518 (PMC8946837; doi:10.3390/cancers14061518)
Supplement: Supplementary file 1 [file cancers-14-01518-s001.zip › Supplementary Figures.pdf]

Supplementary Figures

FIGURE SUPPLEMENTARY 1

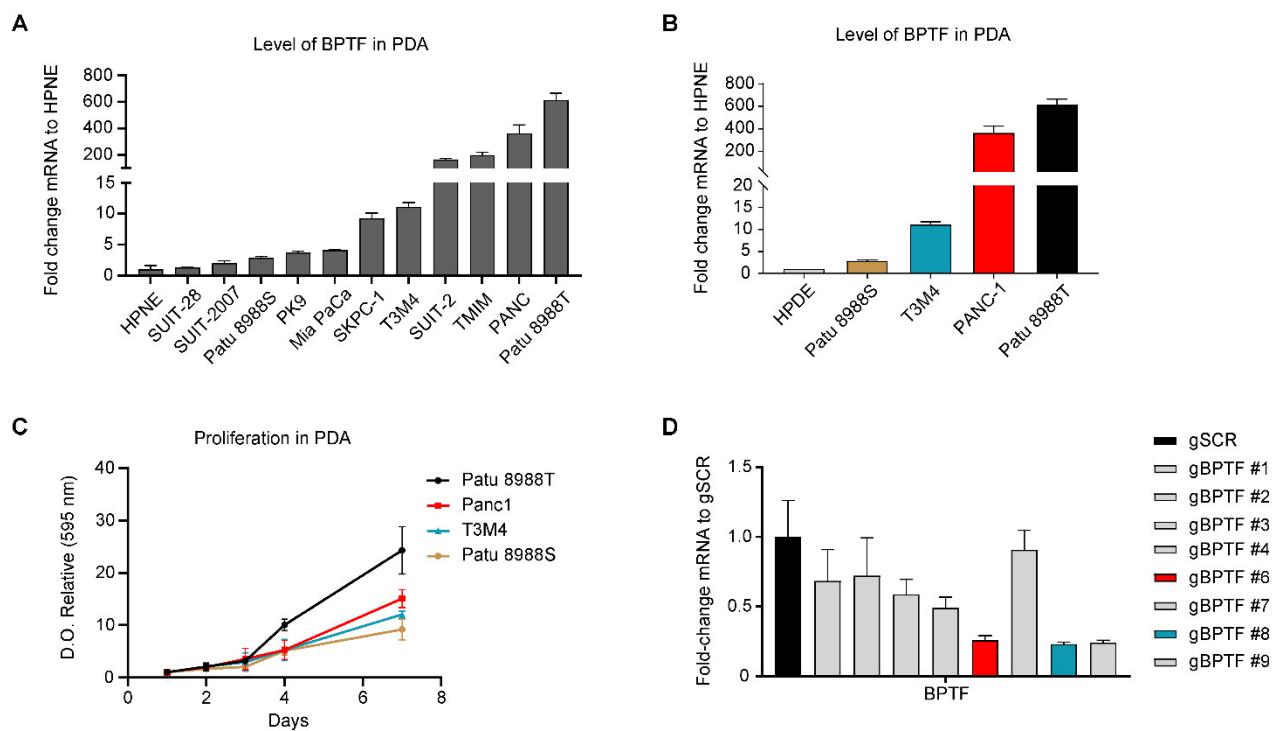

**Supplementary Figure S1.** BPTF levels in PDA. **(A, B)** qRT-PCR for BPTF in a panel of PDA cell lines compared to HPNE (Human Pancreatic Nestin Expressing cells),  $n = 3$  **(C)** Proliferation assay of 4 PDA cell lines  $n = 3$  **(D)** qRT-PCR for BPTF expression upon silencing with 9 different gRNAs against BPTF compared to non-targeted (gSCR),  $n = 3$ .

## SUPPLEMENTARY FIGURE 2

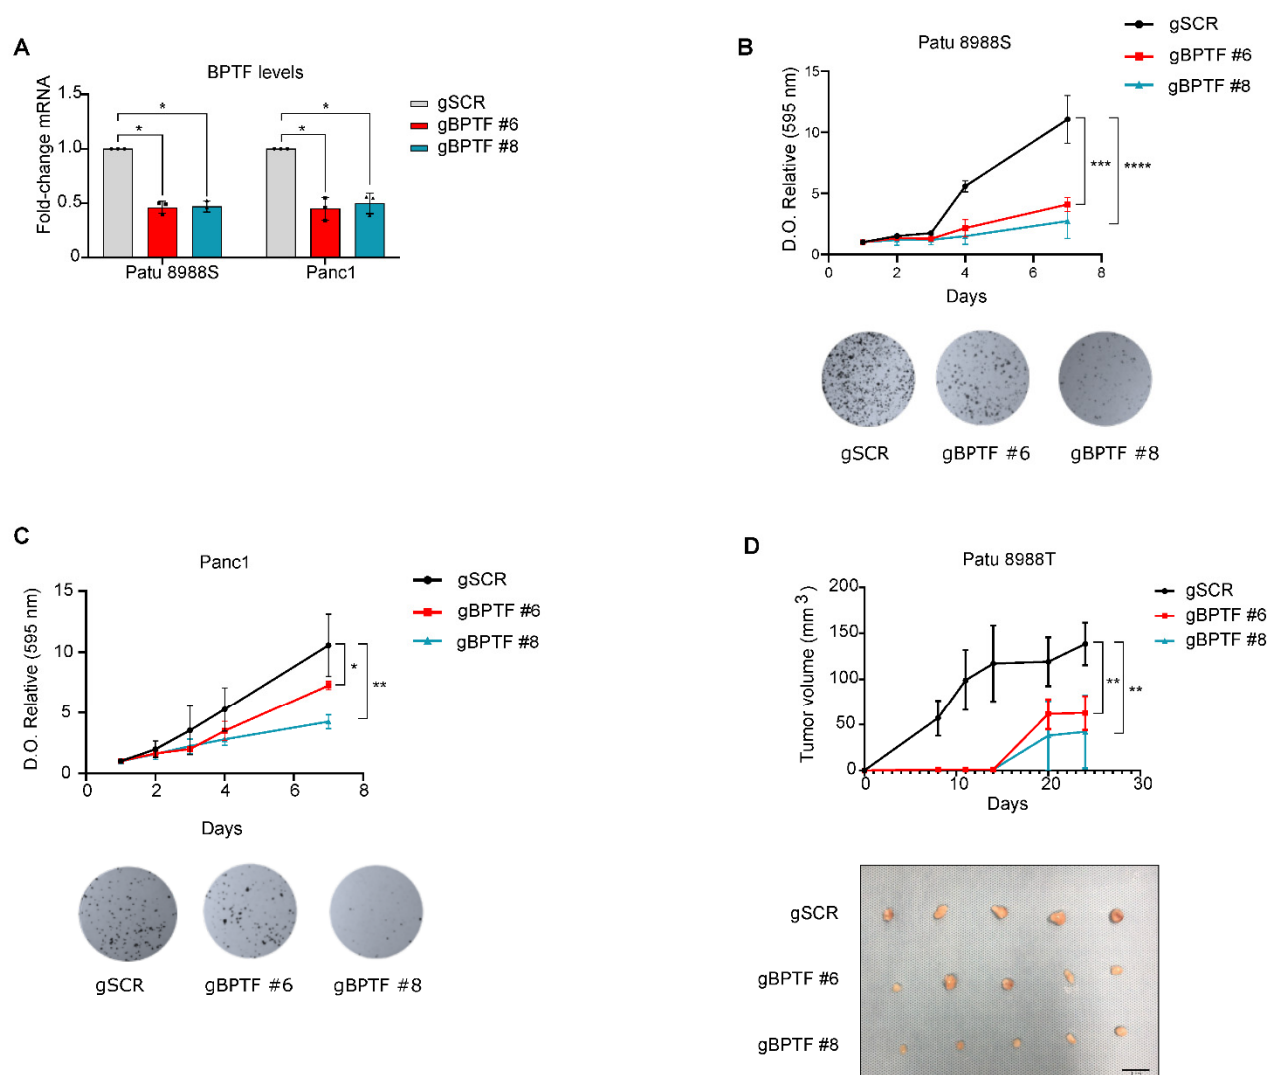

**Supplementary Figure S2.** BPTF downregulation impairs tumour progression in human cell lines by CRISPRi. **(A)** Analysis of BPTF downregulation (gBPTF #6 and gBPTF #8) by RT-qPCR compared to non-targeted (gSCR) in Patu 8988S and Panc1.  $n = 3$ . **(B)** Proliferation and colony assay of BPTF interfered cells compared to non-targeted (gSCR) in Patu 8988S cell line,  $n = 6$ . **(C)** Proliferation and colony assay of BPTF interfered cells compared to non-targeted (gSCR) in Panc1 cell line,  $n = 6$ . **(D)** Nude mice were subcutaneously implanted with either Patu 8988T cells BPTF-interfered (gBPTF #6 and gBPTF #8) or non-targeted (gSCR), tumors were measured for 24 days,  $n = 8$ .

## SUPPLEMENTARY FIGURE 3

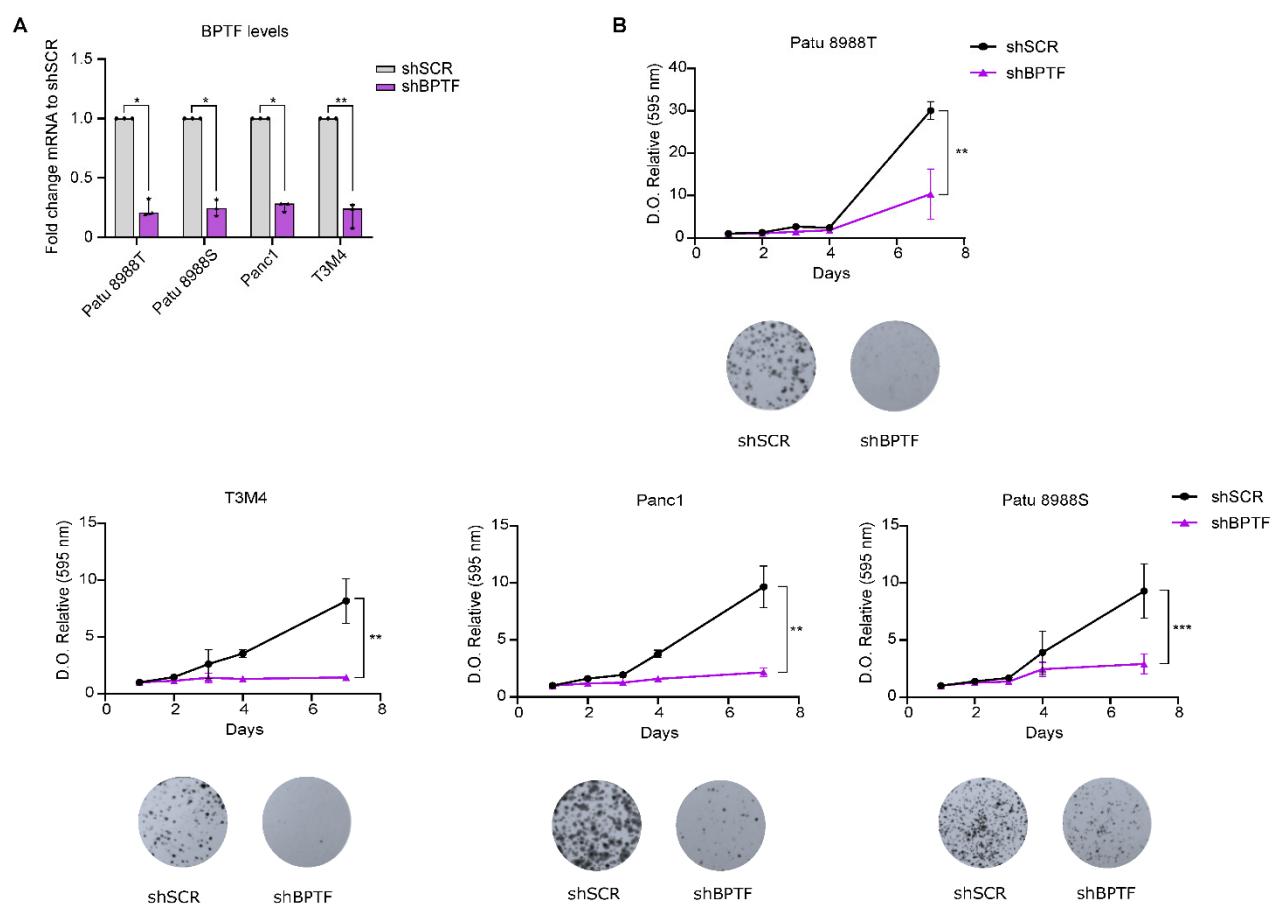

**Supplementary Figure S3.** BPTF downregulation impairs tumour progression in human cell lines by shRNA. **(A)** Analysis of BPTF downregulation using a specific shRNA, by qRT-PCR compared to non-targeted (shSCR) in a panel of 4 PDA cell lines,  $n = 3$ . **(B)** Proliferation and colony assay of shBPTF-interfered cells compared to shSCR in a panel of 4 PDA cell lines,  $n = 6$ .

## SUPPLEMENTARY FIGURE 4

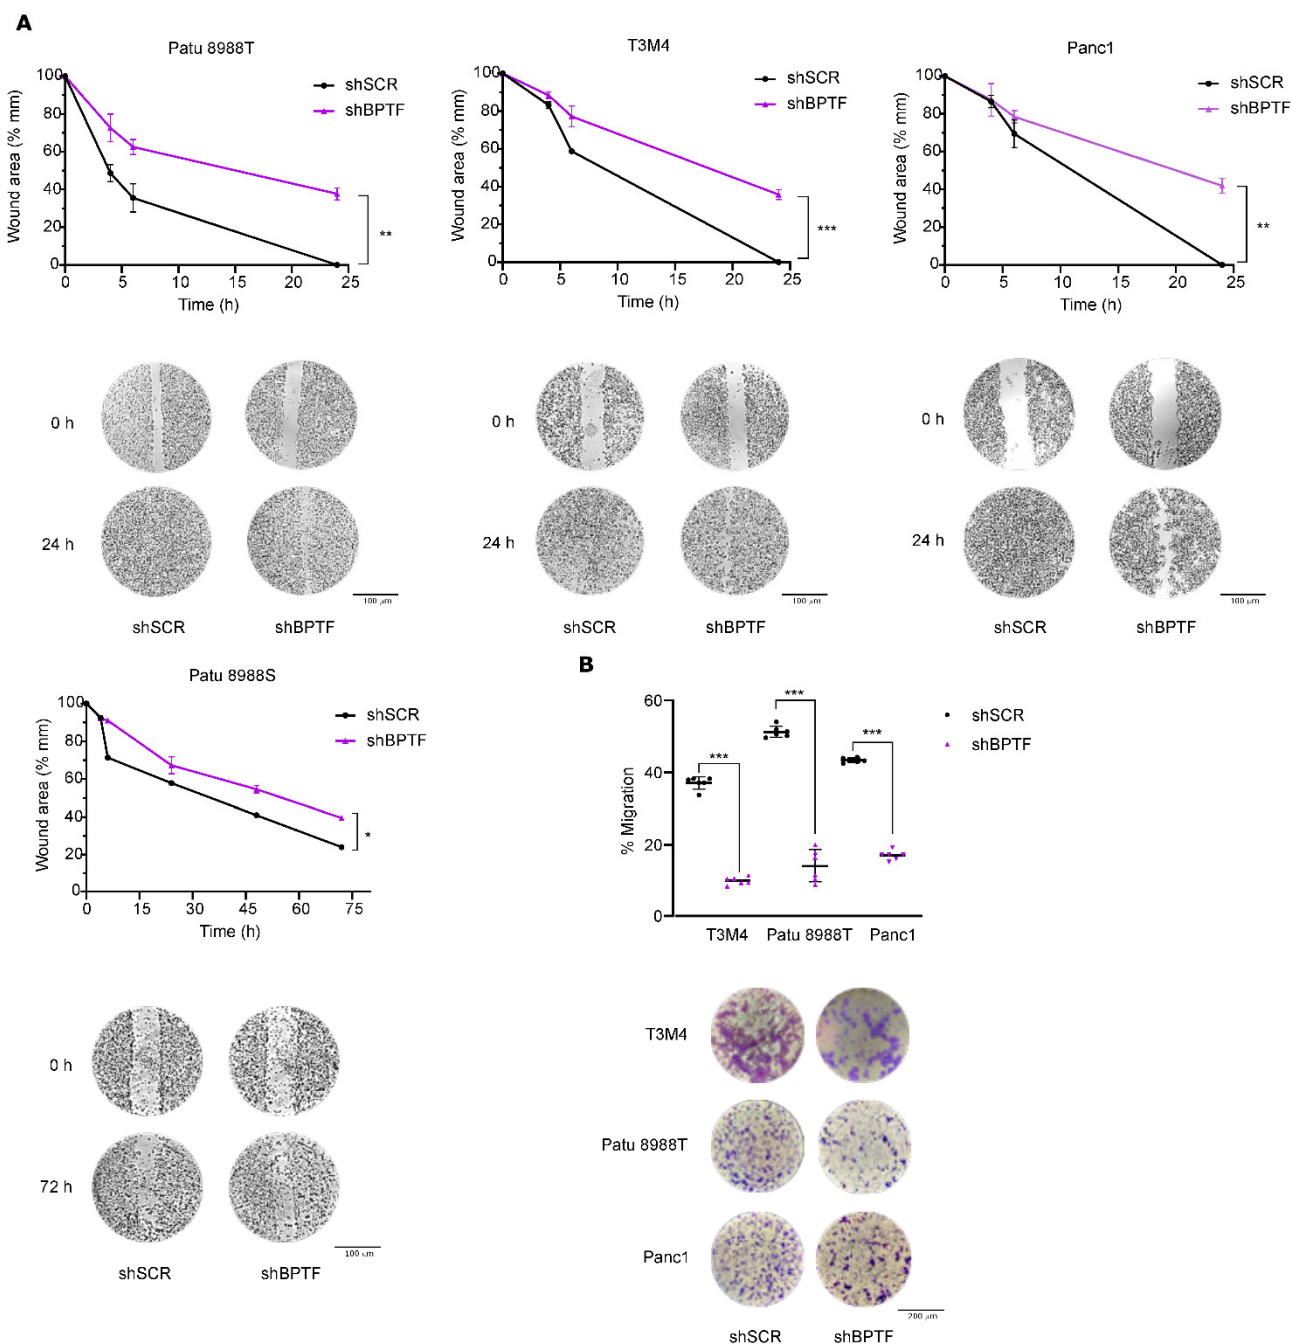

**Supplementary Figure S4.** BPTF impairs cells migration in a panel of human PDA by shRNA. **(A)** Wound healing assay of shBPTF-interfered cells compared to shSCR for 4, 6 and 24 h in a panel of human PDA cell lines, n = 3. **(B)** Transwell assay of shBPTF-interfered cells compared to shSCR for 24 h in a panel of human PDA cell lines, n = 6.

## SUPPLEMENTARY FIGURE 5

A

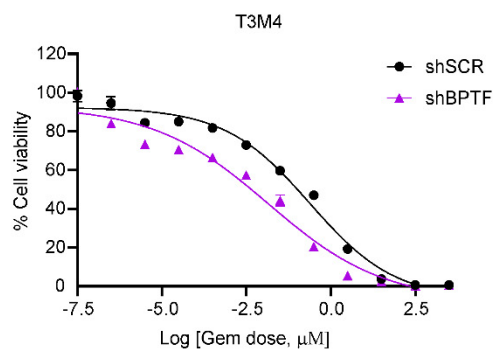

|                        | shSCR              | shBPTF                 |
|------------------------|--------------------|------------------------|
| IC50 ( $\mu\text{M}$ ) | $0.2410 \pm 0.133$ | $0.01419 \pm 0.009386$ |

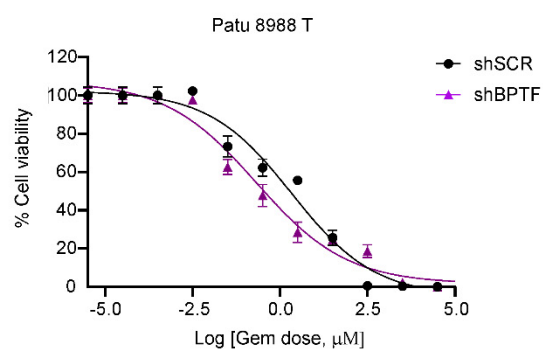

|                        | shSCR            | shBPTF             |
|------------------------|------------------|--------------------|
| IC50 ( $\mu\text{M}$ ) | $2.166 \pm 1.12$ | $0.297 \pm 0.1727$ |

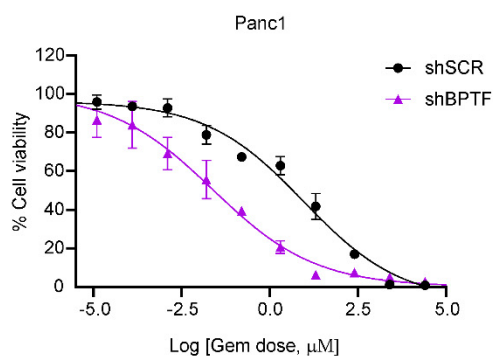

|                        | shSCR            | shBPTF             |
|------------------------|------------------|--------------------|
| IC50 ( $\mu\text{M}$ ) | $9.031 \pm 5.21$ | $0.0241 \pm 0.015$ |

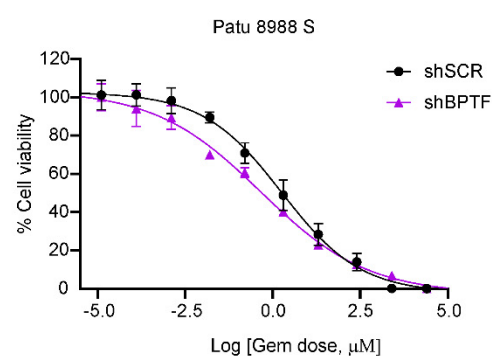

|                        | shSCR           | shBPTF              |
|------------------------|-----------------|---------------------|
| IC50 ( $\mu\text{M}$ ) | $1.811 \pm 0.8$ | $0.4593 \pm 0.2087$ |

**Supplementary Figure S5.** BPTF silencing by shRNA sensitizes to gemcitabine. **(A)** IC50 analysis and values using ATP-lite in a panel of 4 PDA cell lines either shBPTF interfered or non-targeted (gSCR),  $n = 3$ .

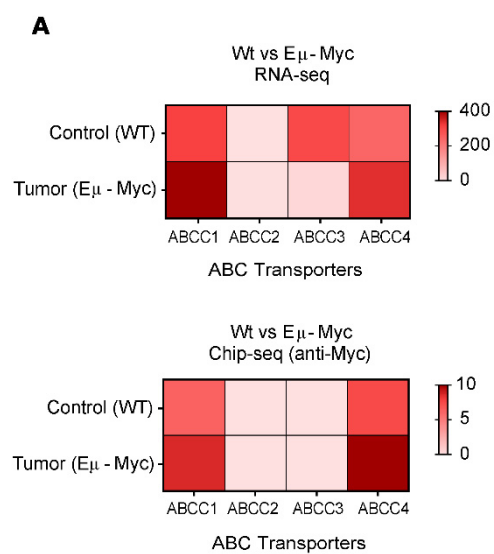

**Supplementary Figure S6.** Expression of ABC-transporters and c-MYC chromatin loading in data obtained from E $\mu$ -Myc mice.
