# Supplementary material for: Targeting BPTF Sensitizes Pancreatic Ductal Adenocarcinoma to Chemotherapy by Repressing ABC-Transporters and Impairing Multidrug Resistance (MDR)
Source: Cancers (Basel). 2022 Mar 16;14(6):1518. doi: 10.3390/cancers14061518 (PMC8946837; doi:10.3390/cancers14061518)
Supplement: Supplementary file 1 [file cancers-14-01518-s001.zip › Supplementary Table S1.xlsx]

## Sheet: Hoja2
	BPTF Human gRNAs for CRISPRi VJ603						Primers for qPCR
human gRNA1	CACCGCCCCCCGATGGGTCCGGACG	VP59				Human BPTF	Fordward	AGCAAGGCCAGTCAAATTCA	VP29
CCCCCCGATGGGTCCGGACG TGG	aaacCGTCCGGACCCATCGGGGGGC	VP60					Reverse	CCTGGGCTGGAATGAAGTAA	VP30
human gRNA2	CACCGccACGTCCGGACCCATCGGG	VP61				Human HPRT	Fordward	GGCGTCGTGATTAGTGATGAT	VP31
ccACGTCCGGACCCATCGGG GGG	aaacCCCGATGGGTCCGGACGTggC	VP62					Reverse	CCATGAGGAATAAACACCCTTT	VP32
human gRNA3	CACCGccgcccACGTCCGGACCCAT	VP63				Mouse BPTF	Fordward	AACAAGTTGTGACTCAAATCATC	VP7
ccgcccACGTCCGGACCCAT CGG	aaacATGGGTCCGGACGTgggcggC	VP64					Reverse	GAATCACTACTGTTAAACCTTGG	VP8
human gRNA4	CACCGCCATCGGGGGGCTCCGCTCG	VP65				Mouse HPRT	Fordward	GGCCAGACTTTGTTGGATTTG	VP3
CCATCGGGGGGCTCCGCTCG CGG	aaacCGAGCGGAGCCCCCCGATGGC	VP66					Reverse	TGCGCTCATCTTAGGCTTTGT	VP4
human gRNA5	CACCGcccACGTCCGGACCCATCGG	VP67				Human ABCC1	Fordward	CTCTATCTCTCCCGACATGACC	VP389
cccACGTCCGGACCCATCGG GGG	aaacCCGATGGGTCCGGACGTgggC	VP68					Reverse	AGCAGACGATCCACAGCAAAA	VP390
human gRNA6	CACCGCTCCGACATGAGGGGCCGG	VP79				Human ABCC2	Fordward	CCCTGCTGTTCGATATACCAATC	VP391
GCTCCGACATGAGGGGCCGG CGG	aaacCCGGCCCCTCATGTCGGAGC	VP80					Reverse	TCGAGAGAATCCAGAATAGGGAC	VP392
human gRNA7	CACCGCGGGAGCCGCGGGCTGCTT	VP81				Human ABCC3	Fordward	TGGGGTGAAGTTTCGTACTGG	VP393
GCGGGAGCCGCGGGCTGCTT GGG	aaacAAGCAGCCCGCGGCTCCCGC	VP82					Reverse	CACGTTTGACTGAGTTGGTGATA	VP394
human gRNA8	CACCGCCCCCAGTCACCGAGCGAGA	VP107				Human ABCC4	Fordward	AGCTGAGAATGACGCACAGAA	VP395
CCCCCAGTCACCGAGCGAGA GGG	aaacTCTCGCTCGGTGACTGGGGGC	VP108					Reverse	ATATGGGCTGGATTACTTTGGC	VP396
human gRNA9	CACCGCTCCACCCGCTTCCGTCGGC	VP109
CTCCACCCGCTTCCGTCGGC CGG	aaacGCCGACGGAAGCGGGTGGAGC	VP110
	BPTF Mouse gRNAs for CRISPRi VJ603						Primers for CHIP-qPCR
mouse gRNA1	CACCGCCCCCCGATGGGTCCGGACG	VP59				ABCC1 (A)	Fordward	CTTGGTTGCTGTGAGTGACG	VP507
GCATGTCGGAGCCGCGGCTTG CGG	aaacCGTCCGGACCCATCGGGGGGC	VP60					Reverse	CCTAGACCCTGAGACACCCA	VP508
mouse gRNA2	CACCGccACGTCCGGACCCATCGGG	VP61				ABCC1 (B)	Fordward	CCCTTAGATTTAACCCCGGC	VP505
GCCCGCCTCCGGACCCATAG GGG	aaacCCCGATGGGTCCGGACGTggC	VP62					Reverse	TCAAGACAGCACGAGACAGA	VP506
mouse gRNA3	CACCGccgcccACGTCCGGACCCAT	VP63				ABCC1 (C)	Fordward	GTTTGAGCTGAGCATGATGGC	VP491
GCGCGAGCGCAGCCCCCCTAT GGG	aaacATGGGTCCGGACGTgggcggC	VP64					Reverse	TTGCCATGTTGCTAAGCCTG	VP492
mouse gRNA4	CACCGCCATCGGGGGGCTCCGCTCG	VP65				RFN	Fordward	CCACGTACTTCTGCAACACG	VP247
GTCCGACATGAGGGGCCGGCG GGG	aaacCGAGCGGAGCCCCCCGATGGC	VP66					Reverse	ACTGCACTTCTGGGGCAC	VP248
mouse gRNA5	CACCGcccACGTCCGGACCCATCGG	VP67				ACHR	Fordward	CCTTCATTGGGATCACCACG	VP245
GCAGCCCCCCTATGGGTCCGG AGG	aaacCCGATGGGTCCGGACGTgggC	VP68					Reverse	AGGAGATGAGTACCAGCAGGTTG	VP246
mouse gRNA6	CACCGCTCCGACATGAGGGGCCGG	VP79
GGGCGCCACCTCAGCCTGGG CGG	aaacCCGGCCCCTCATGTCGGAGC	VP80
